# Supplementary material
Source: publisher figshare collection journal article supplement (https://tandf.figshare.com/ndownloader/files/14296730)

**Supporting Information**

**Facile synthesis of 1-(arylimino)naphthalen-2(*1H*)-ones from anilines and 2-naphthols promoted by NaBr/K2S2O8/CAN**

Fei Yu,a Hui Xu,a Abdullah M. Asiri,b Hadi M. Marwani,b Ze Zhanga,*

aSchool of Biological and Chemical Engineering, Anhui Polytechnic University, Wuhu 241000, P. R. China; E-mail: z[zhang@ahpu.edu.cn](mailto:zhang@ahpu.edu.cn)

bChemistry Department, Faculty of Science, King Abdulaziz University, Jeddah 21589, Saudi Arabia

**Contents**

1. **1HNMR and 13CNMR spectra for compounds 3a-3p**
2. **NOESY spectra for compounds 3a**

**1. 1HNMR and 13CNMR spectra for compounds 3a-3p**


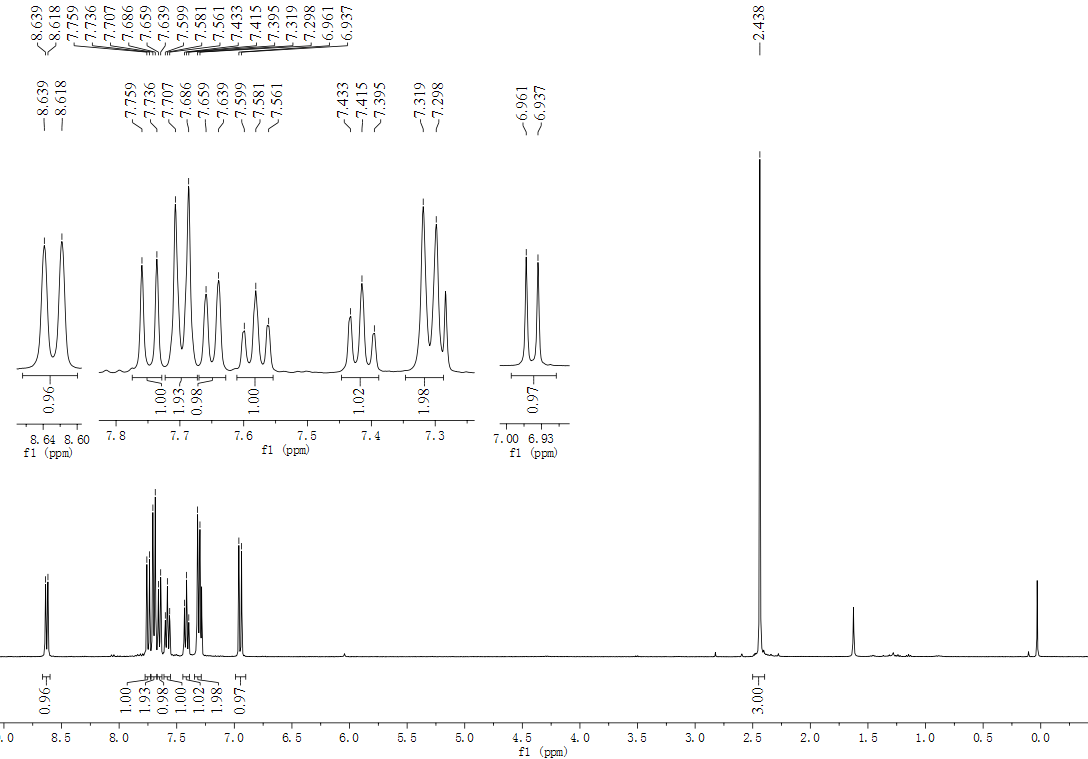

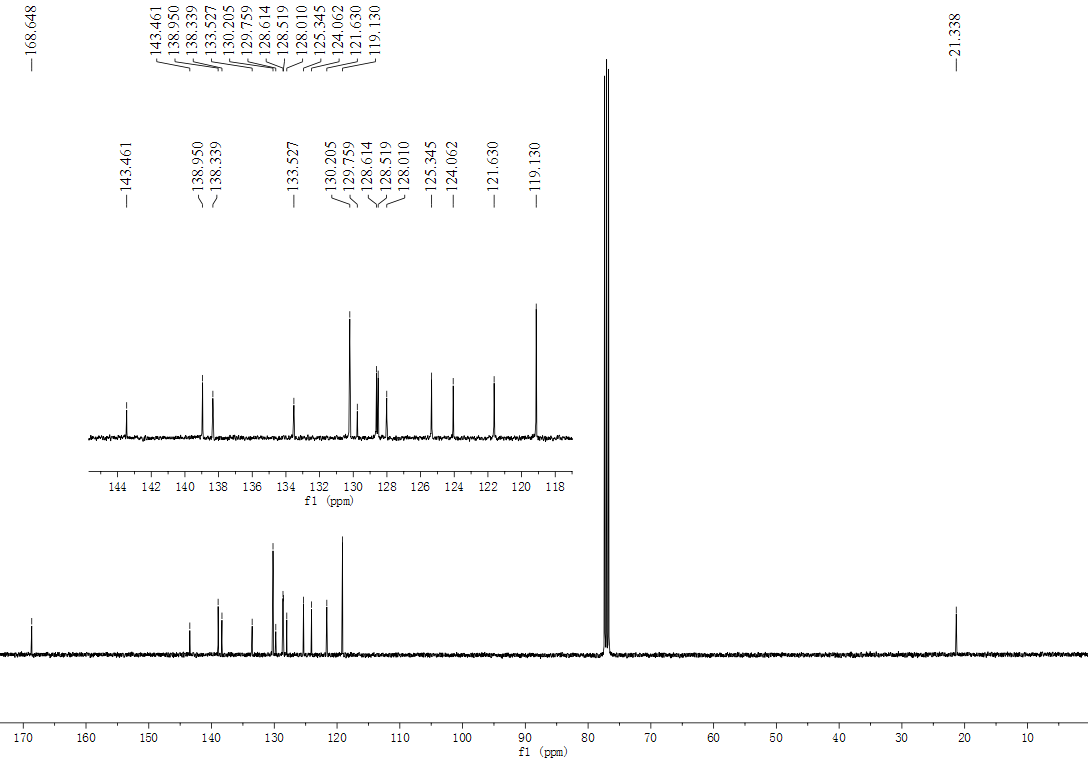

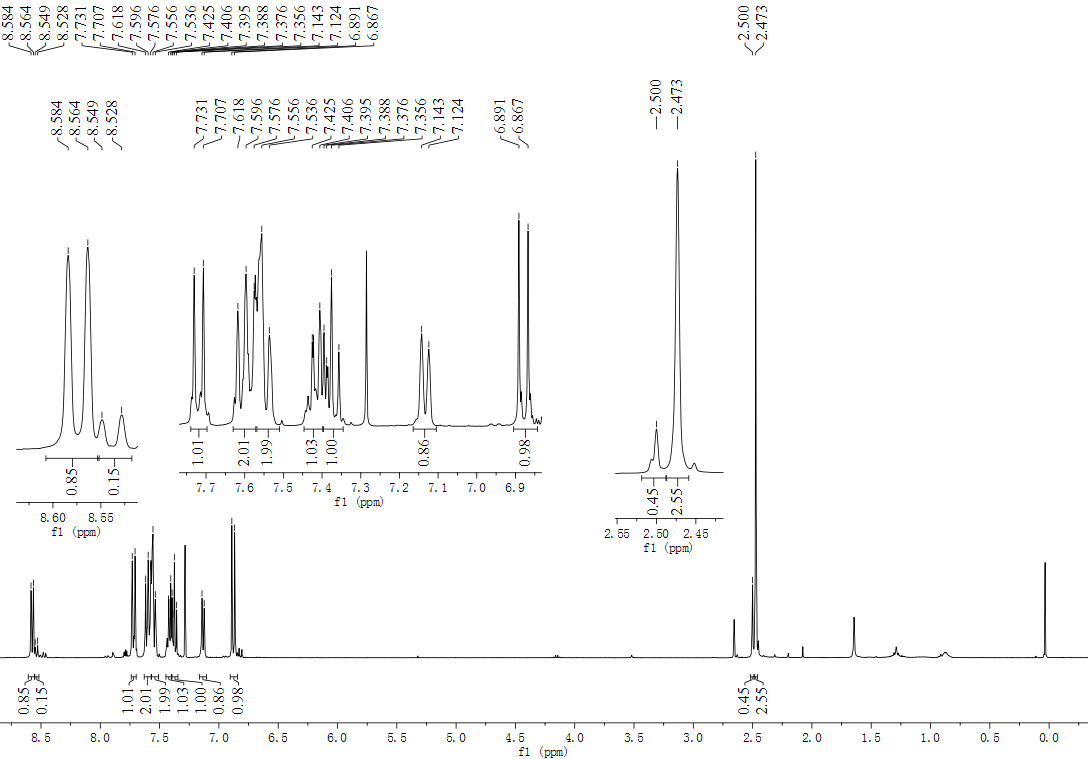

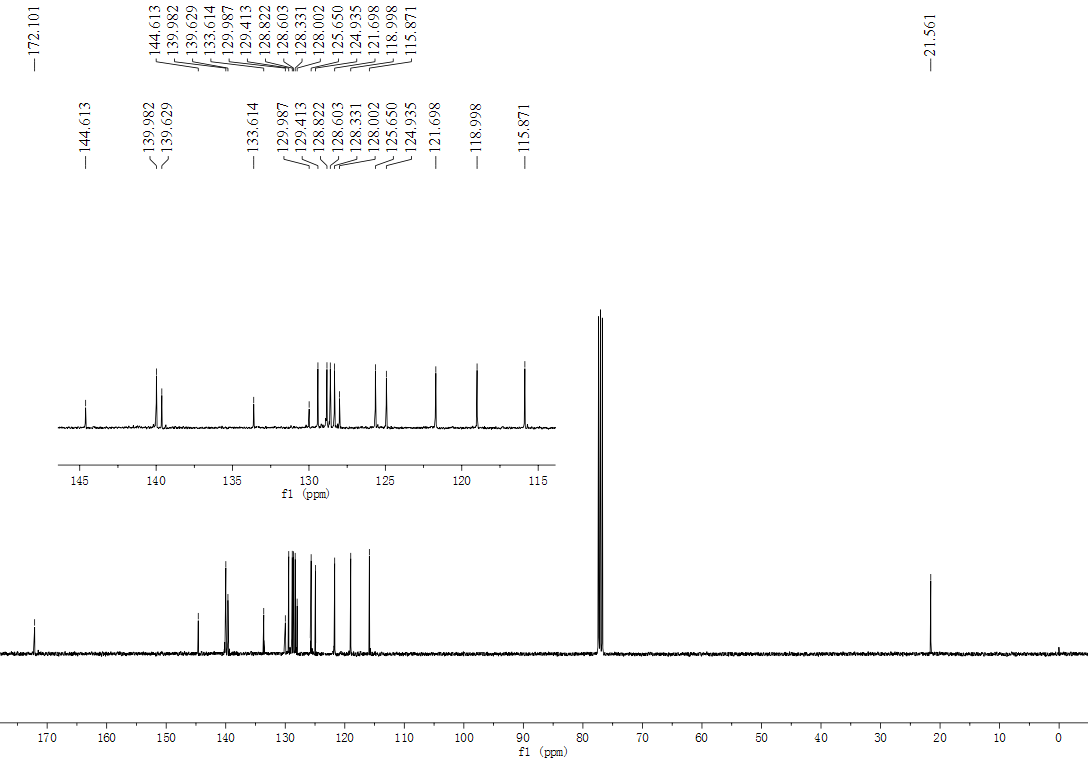

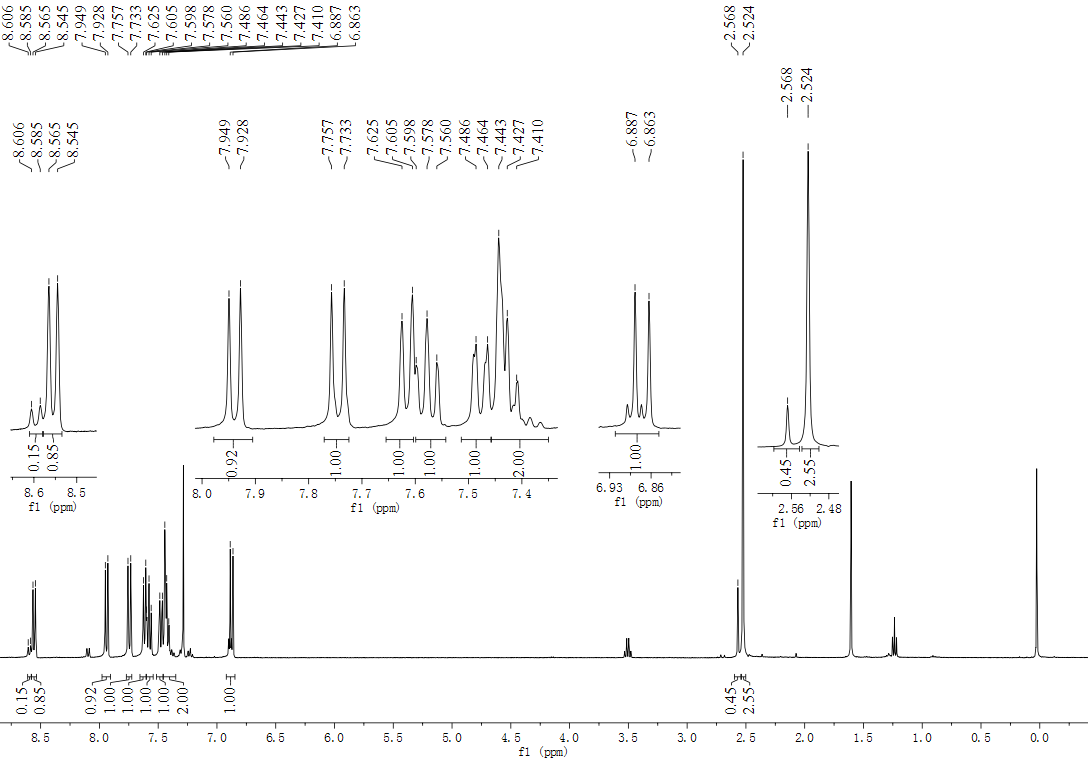

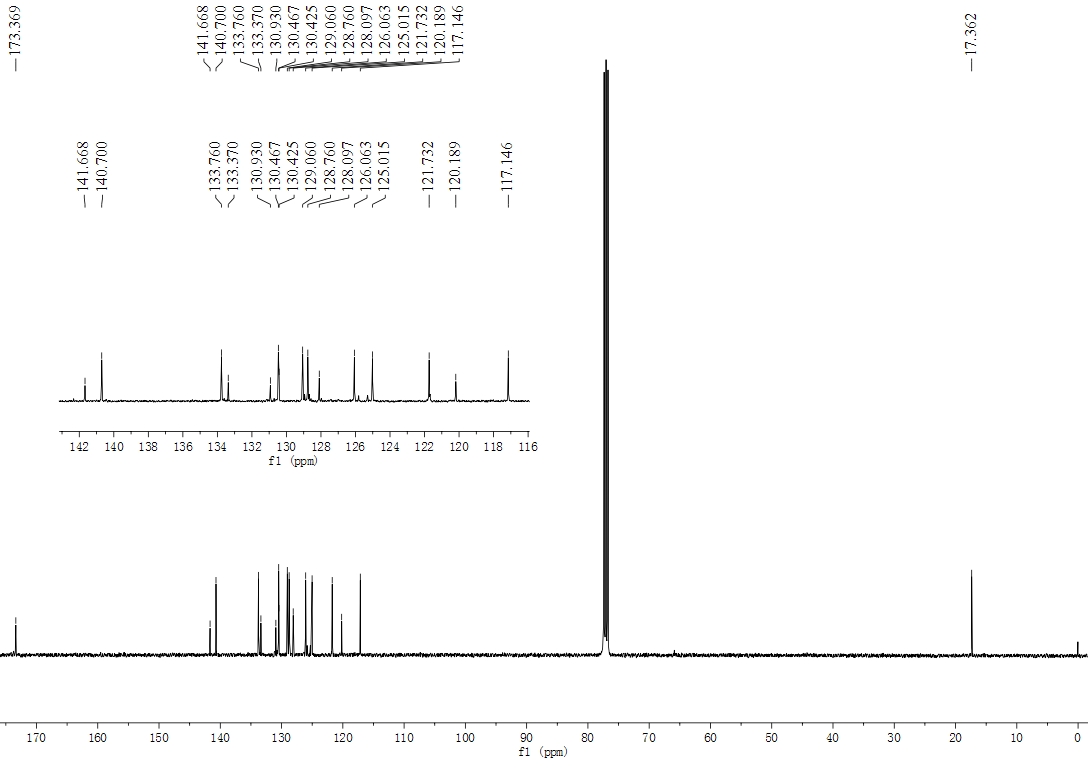

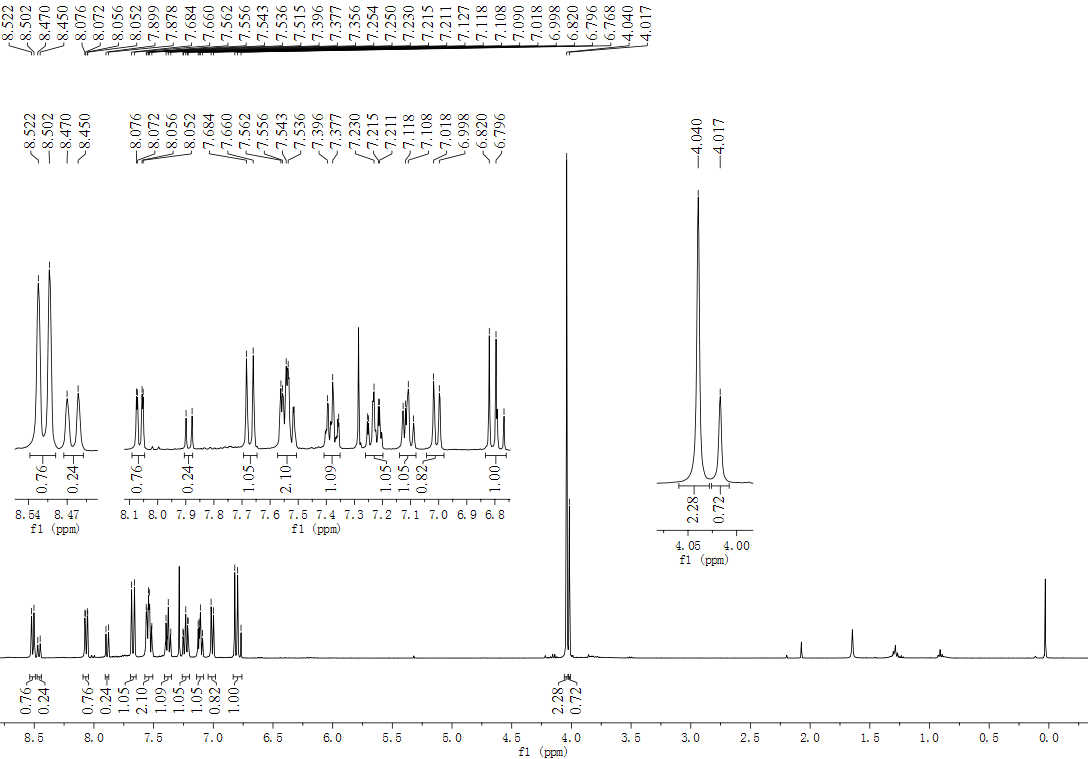

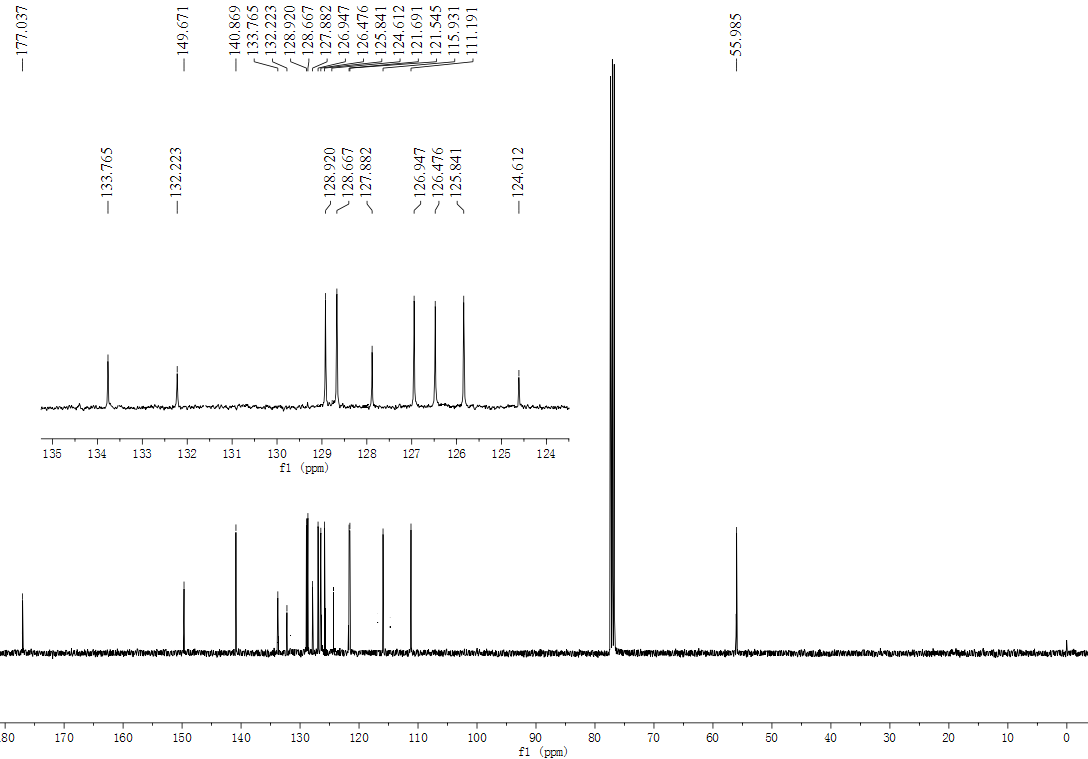

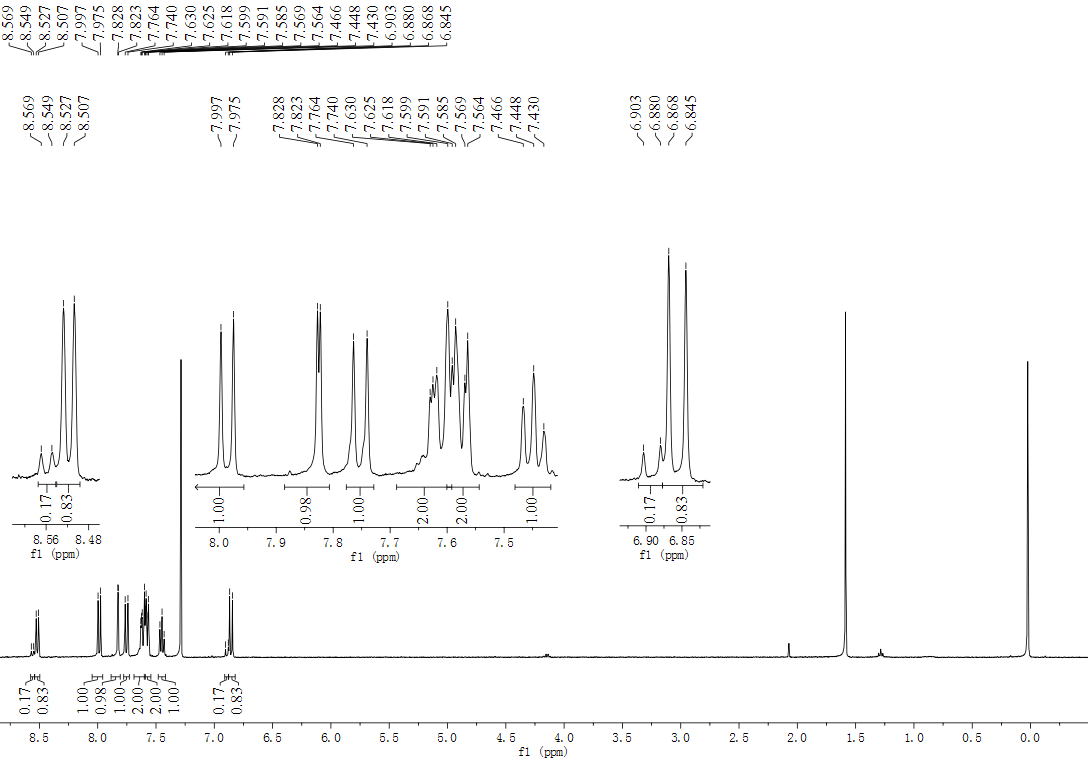

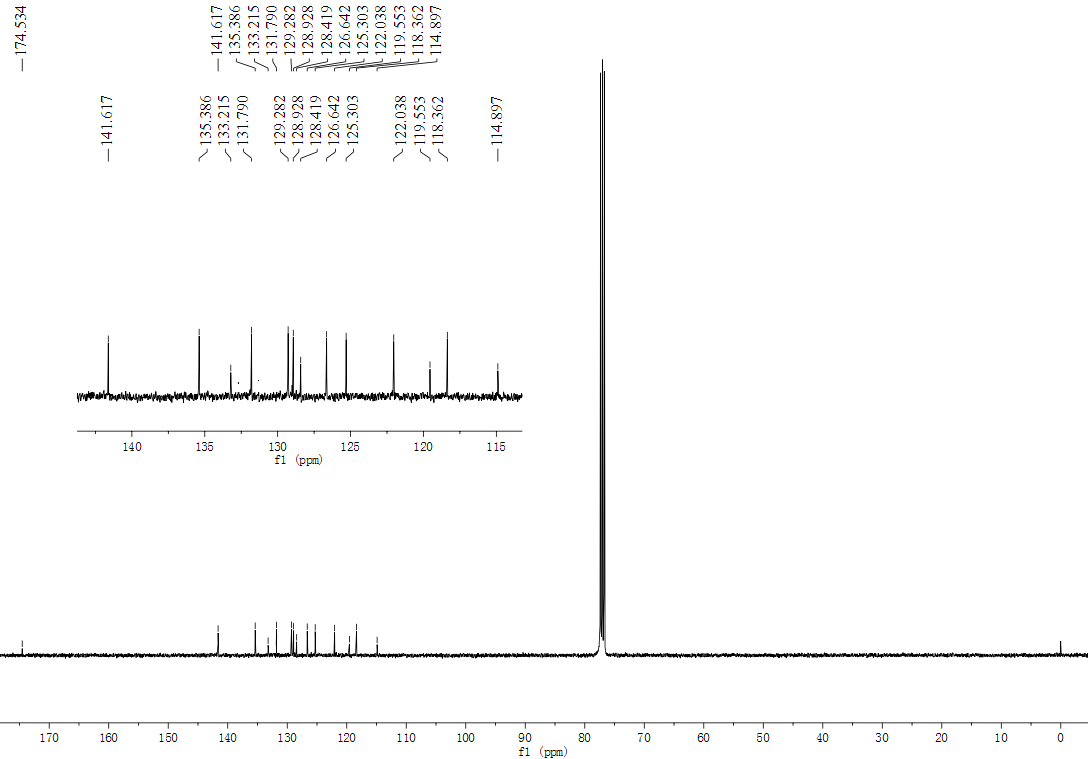

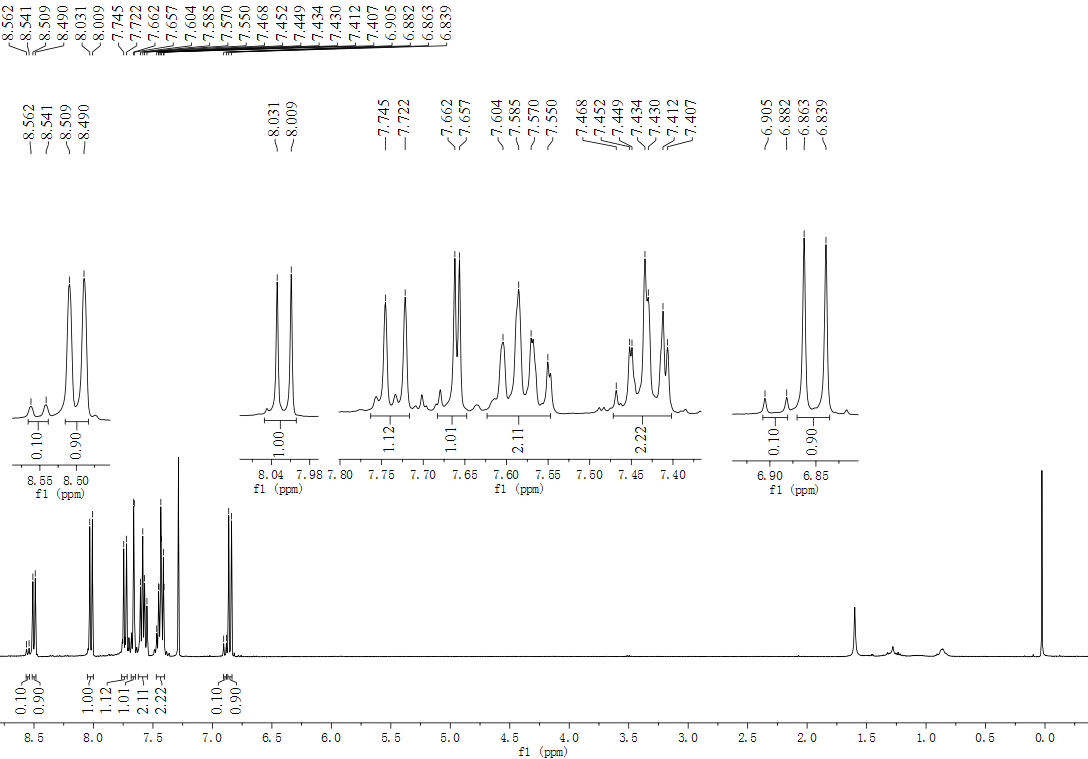

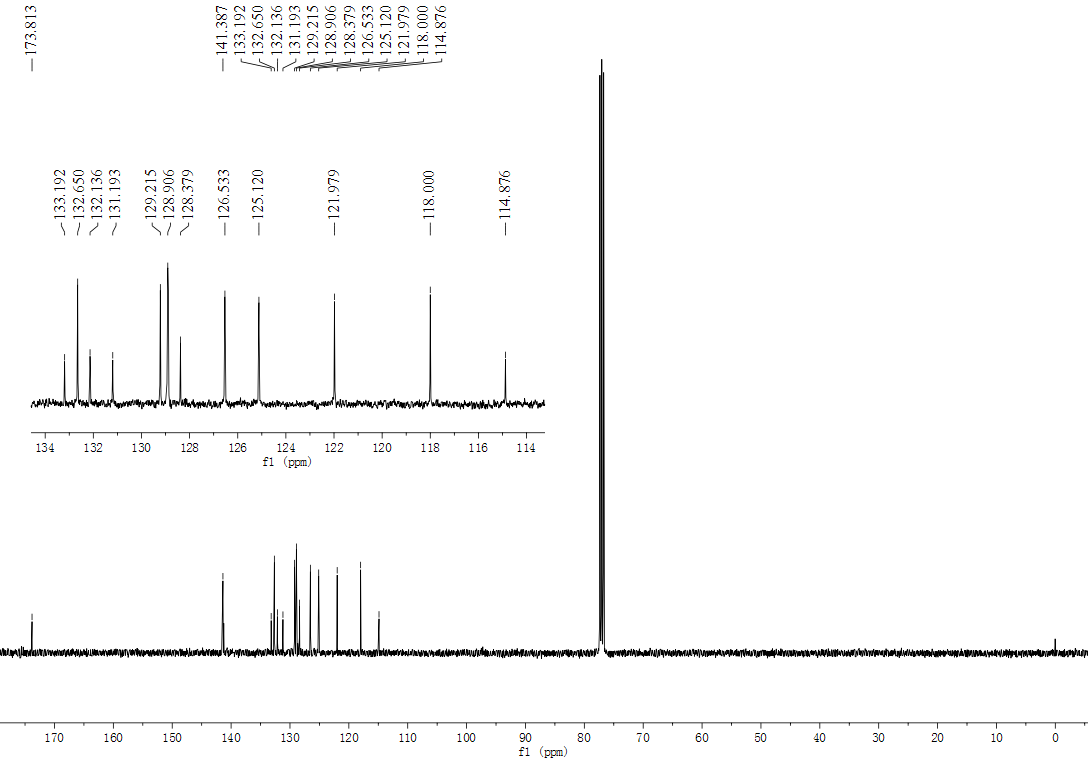

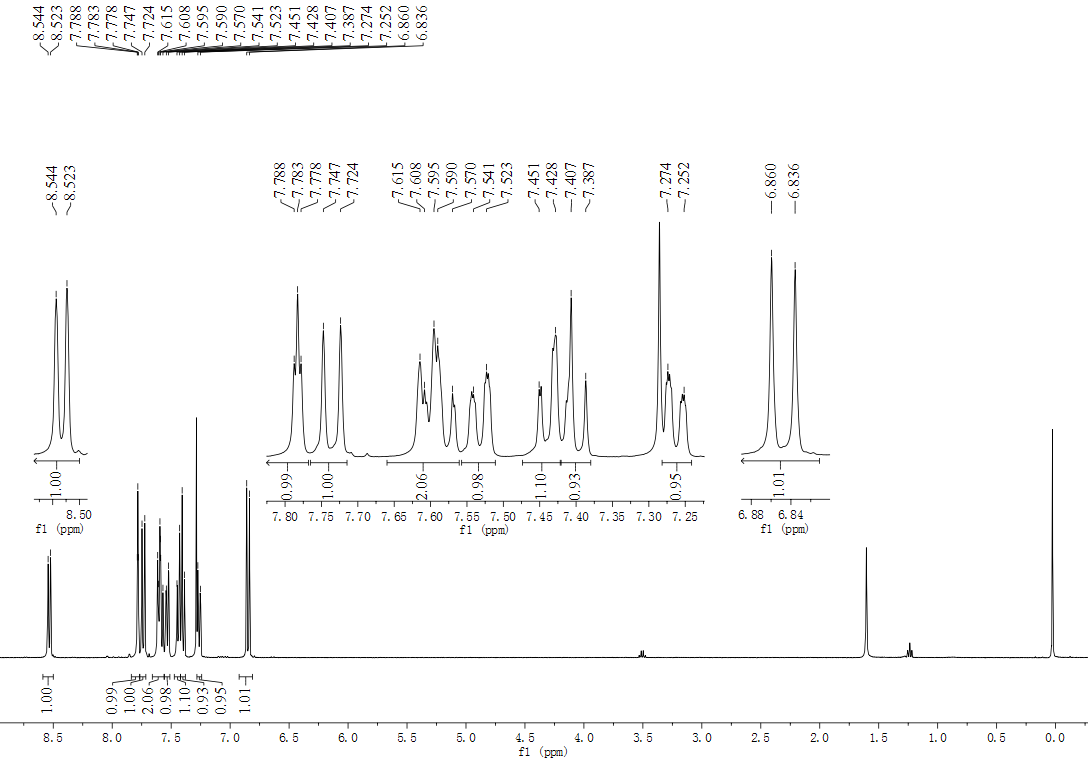

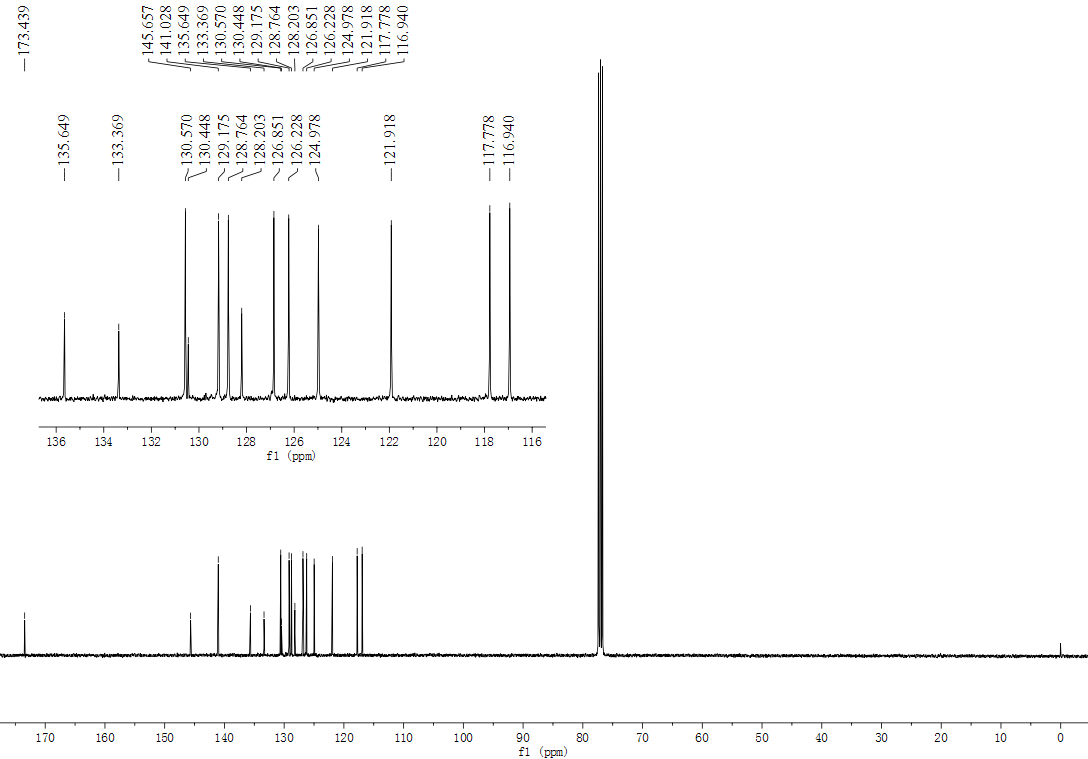

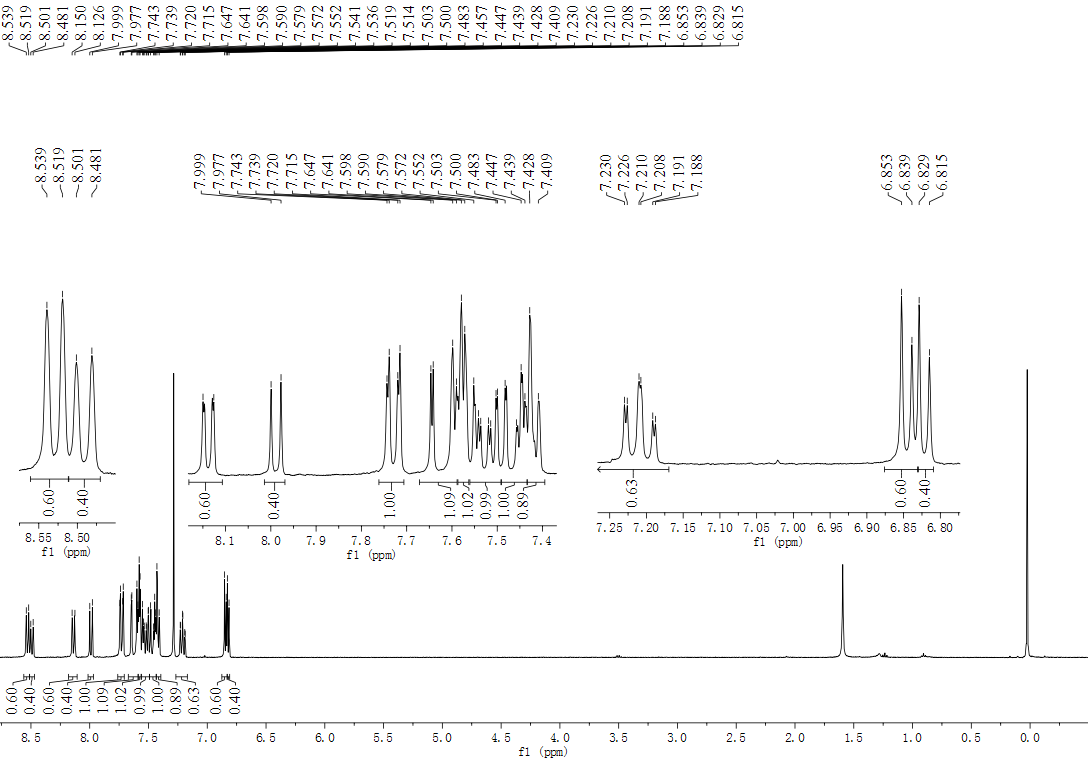

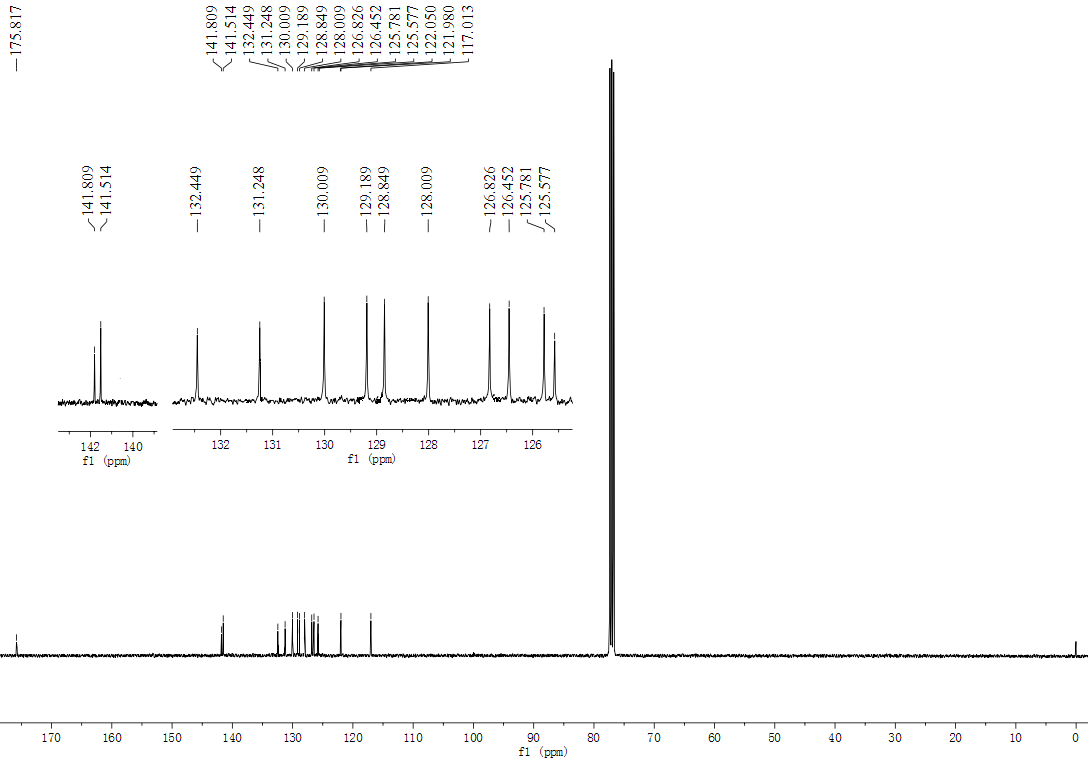

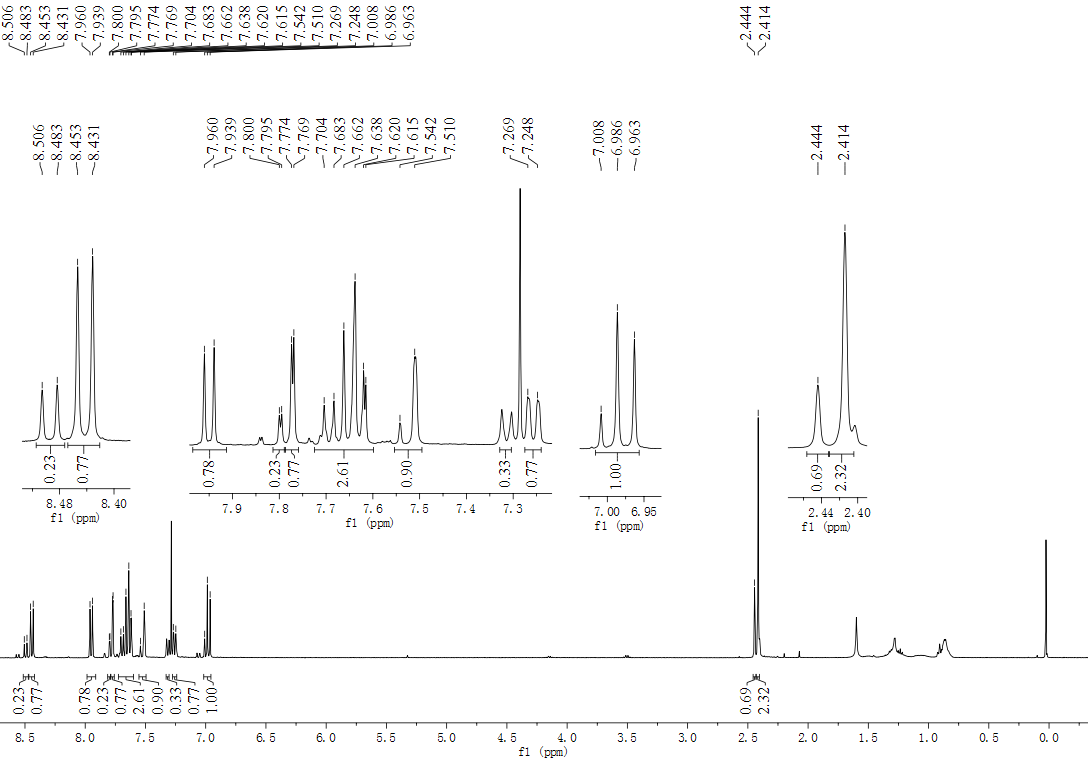

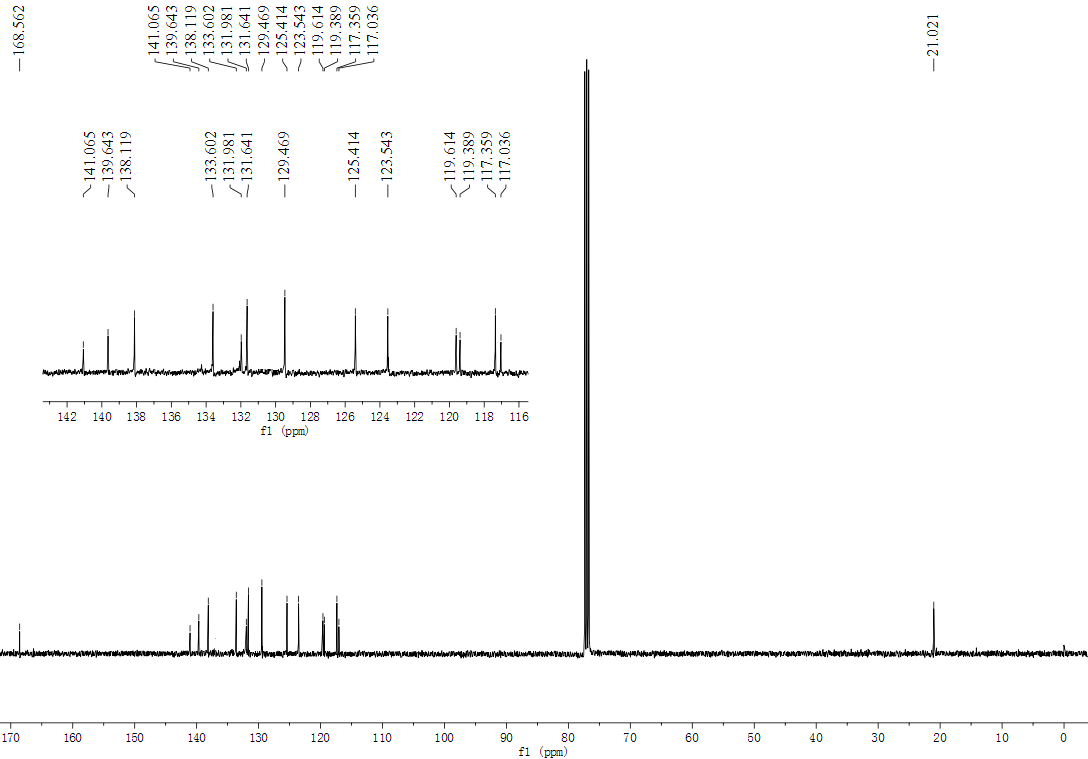

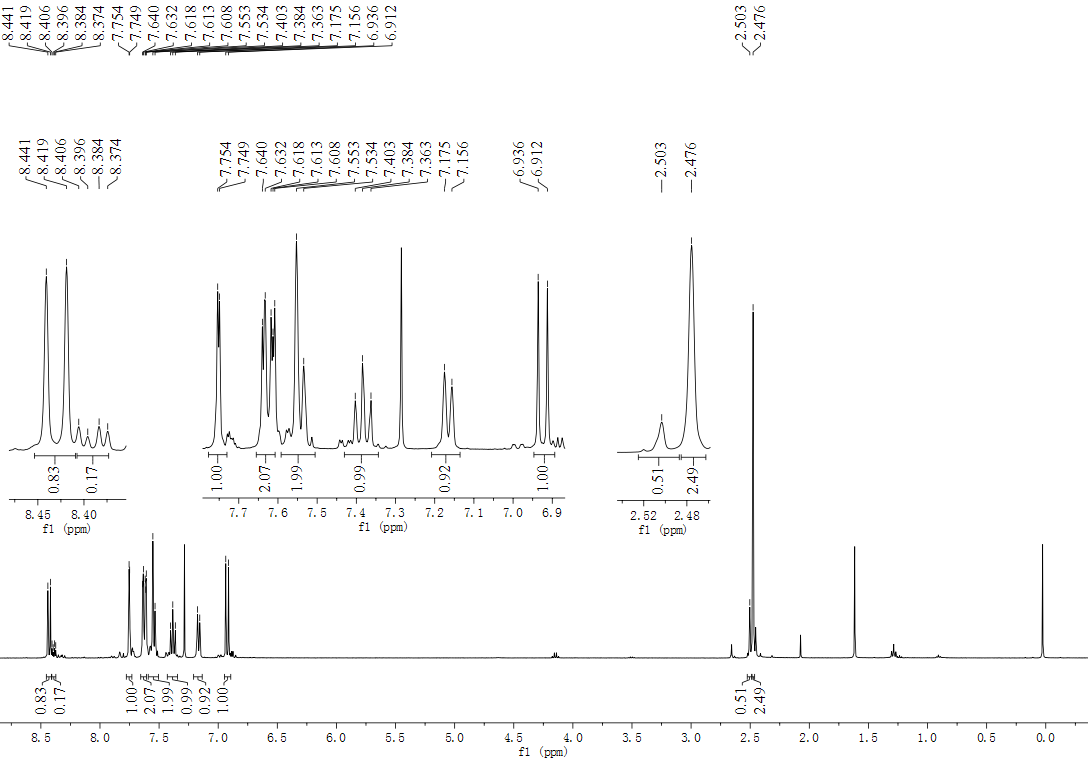

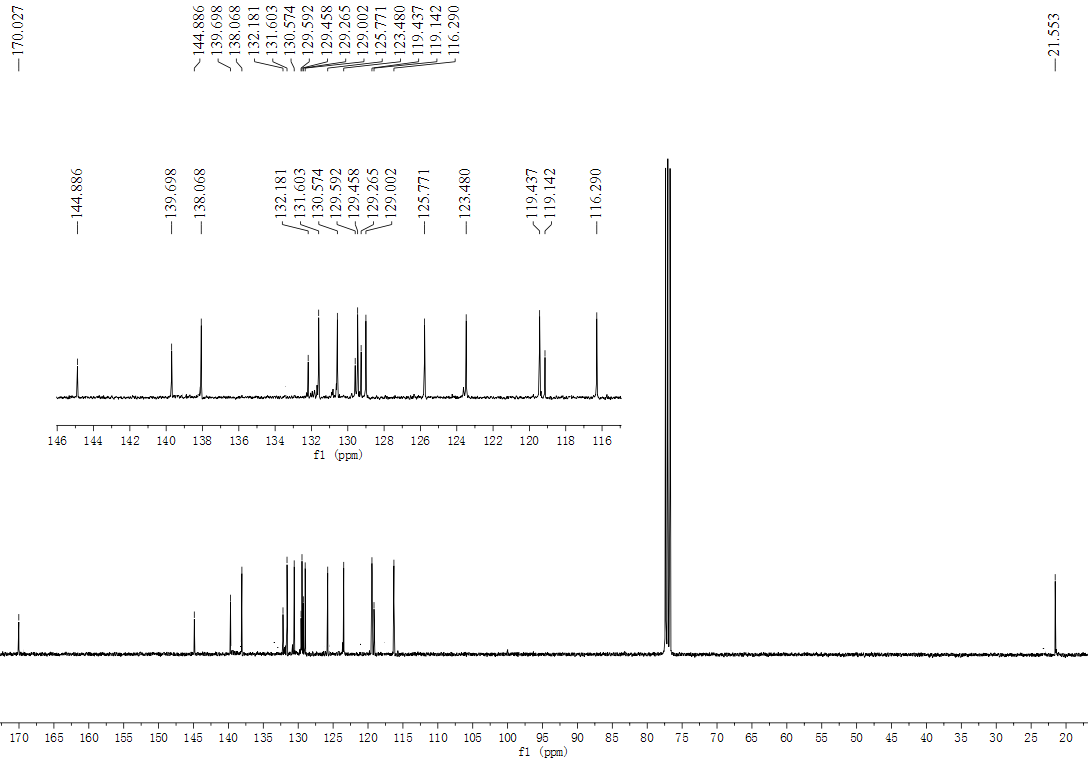

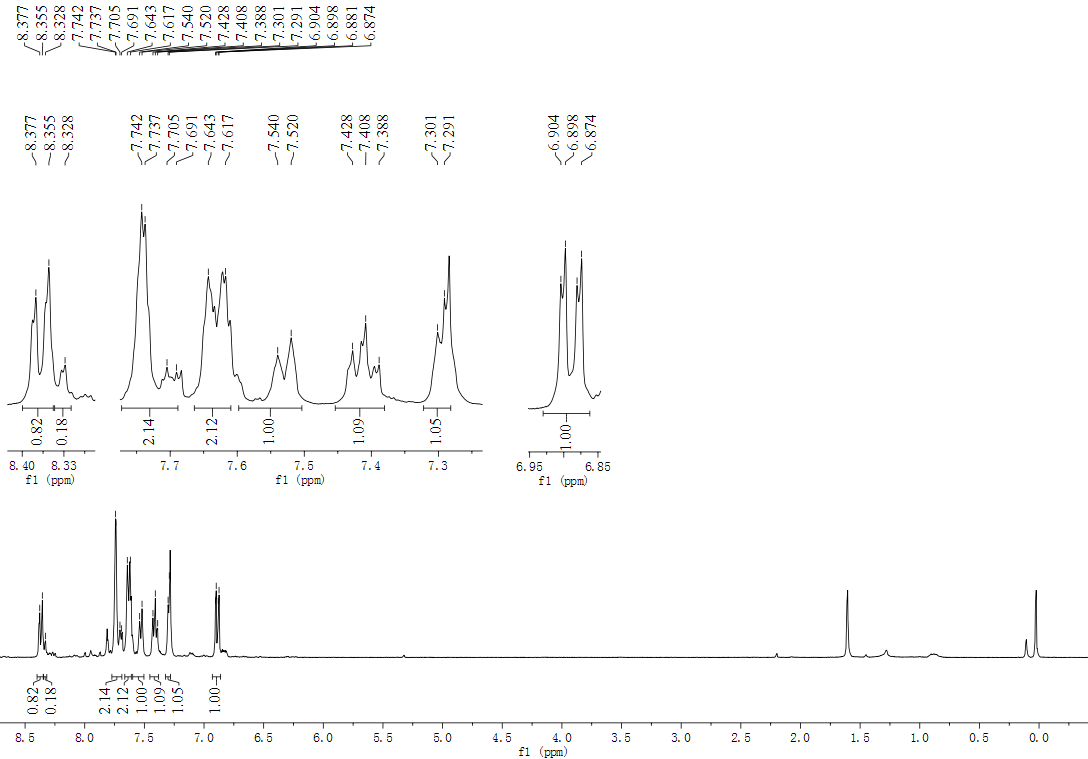

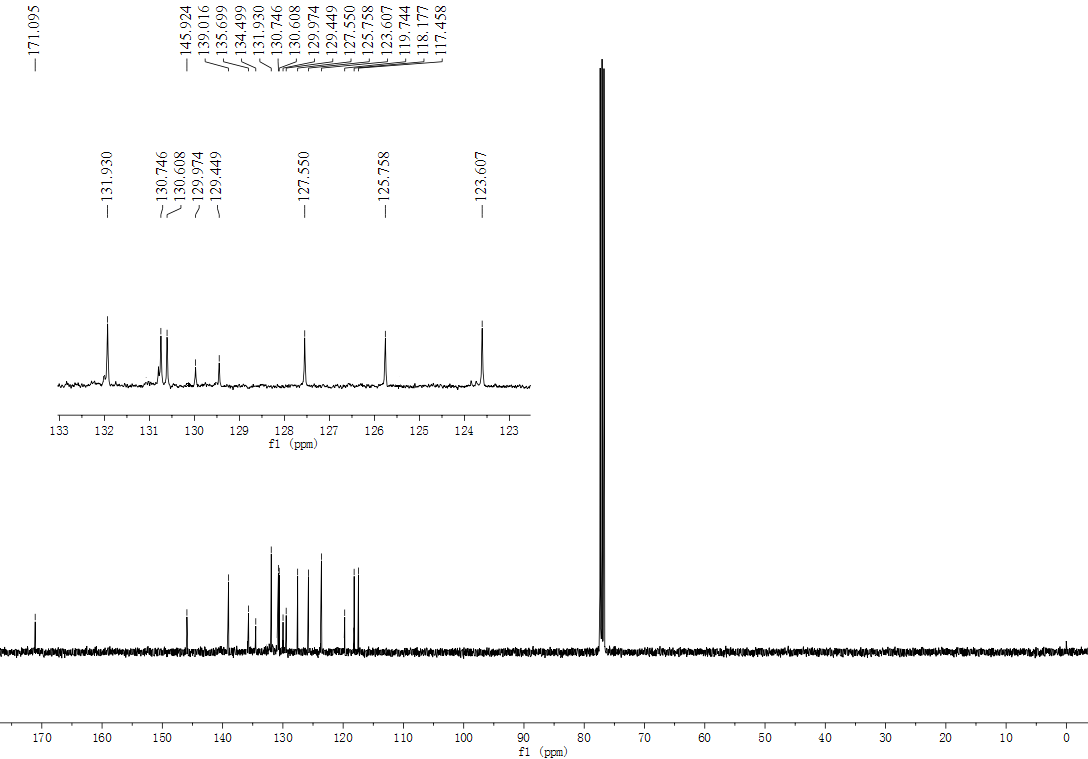

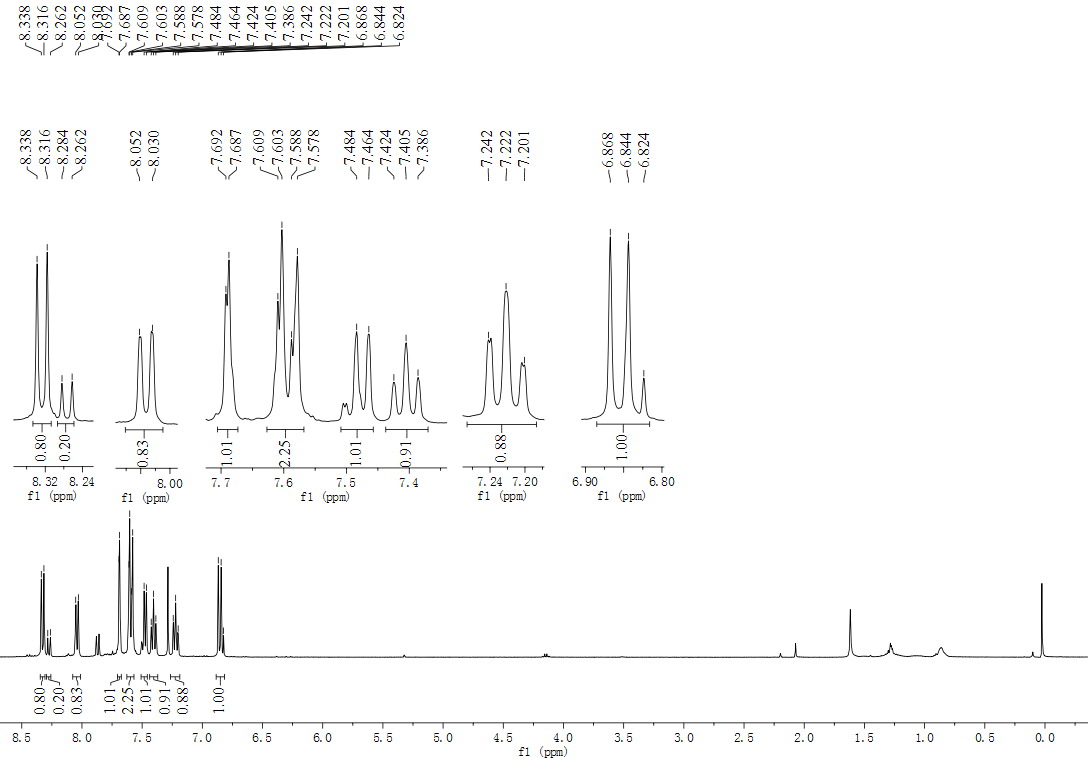

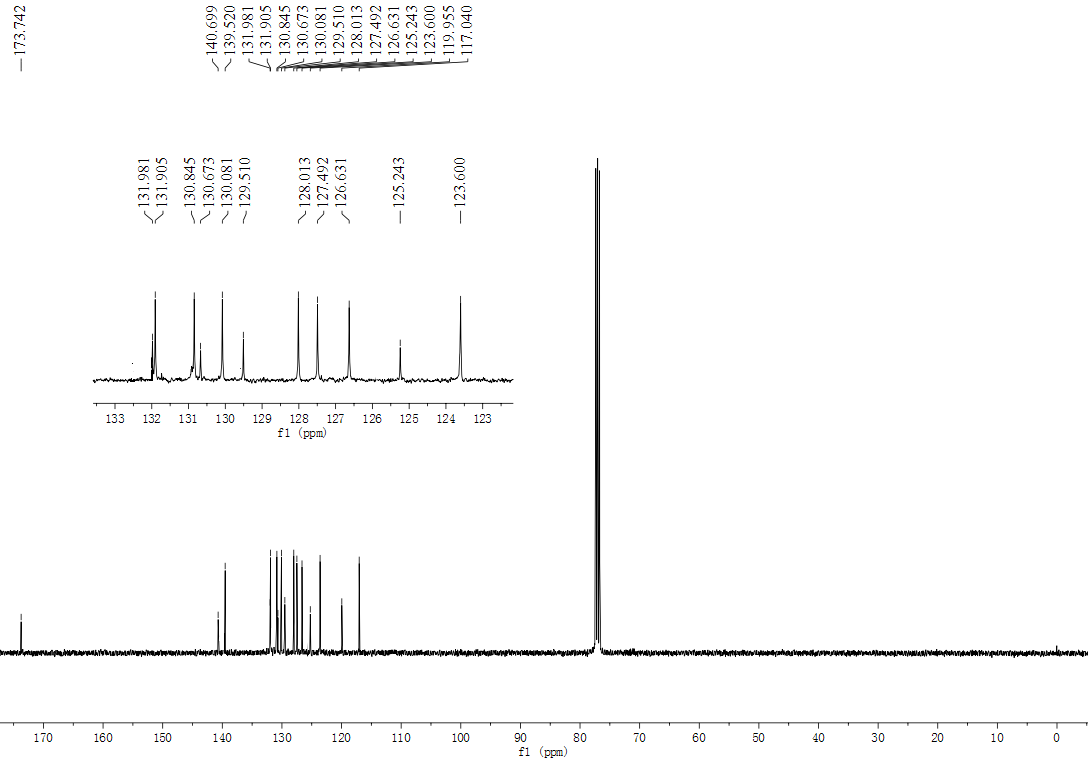

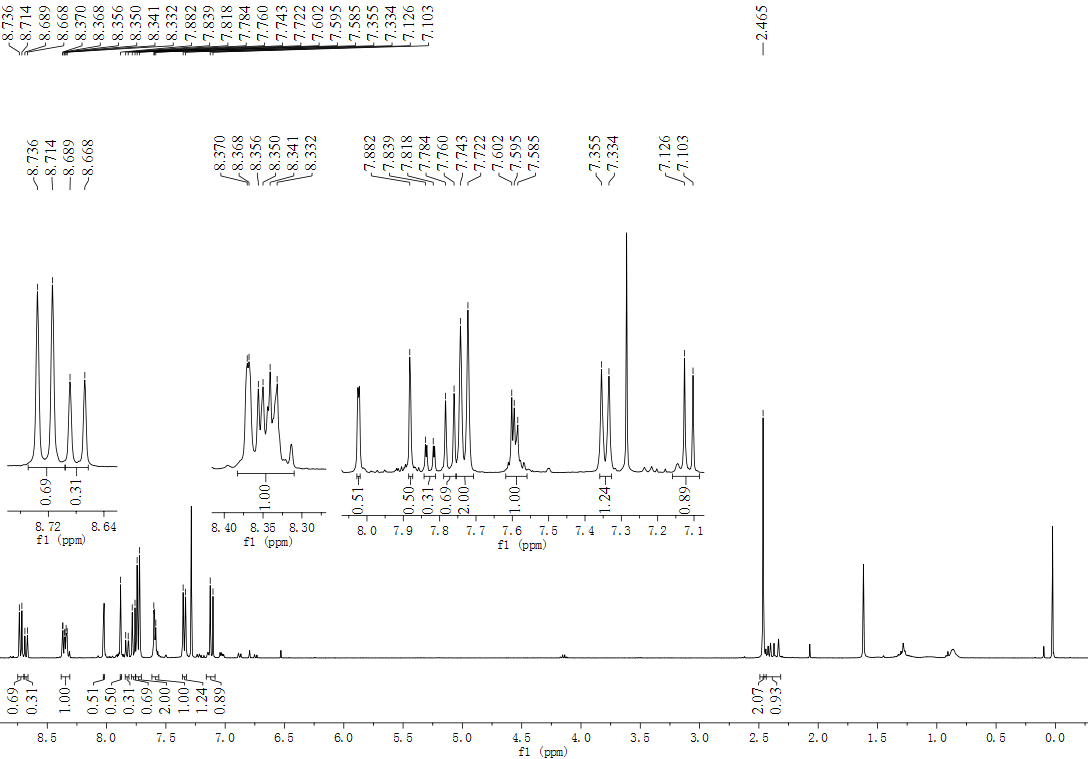

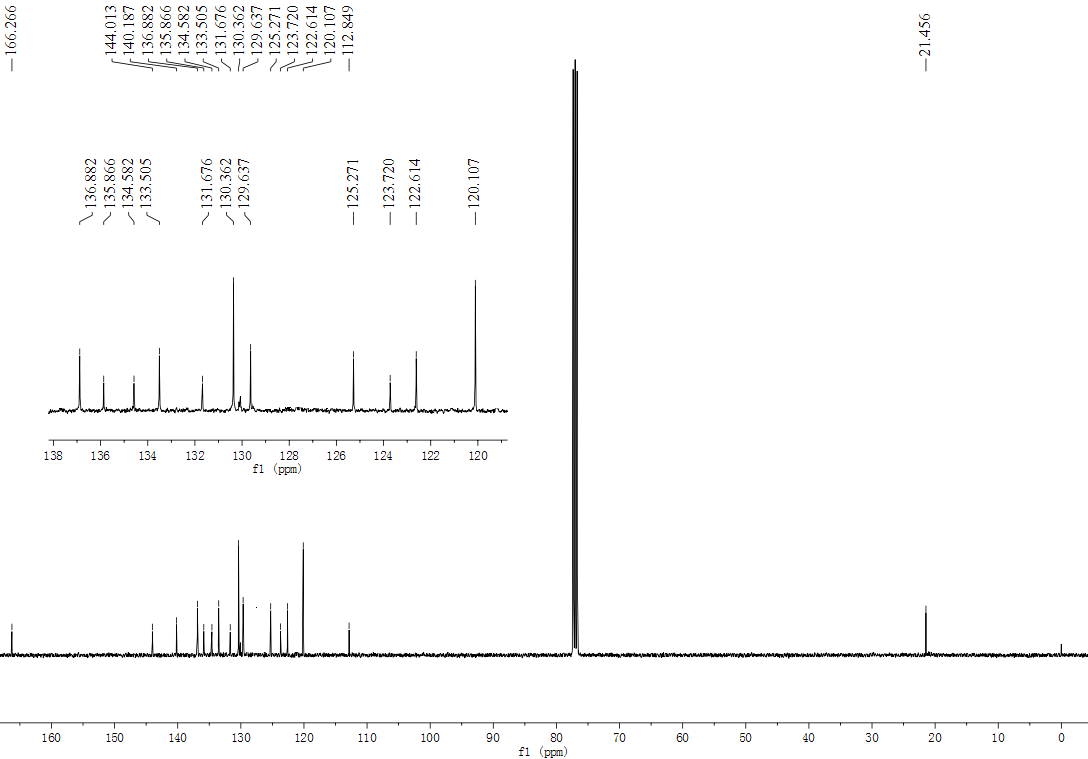

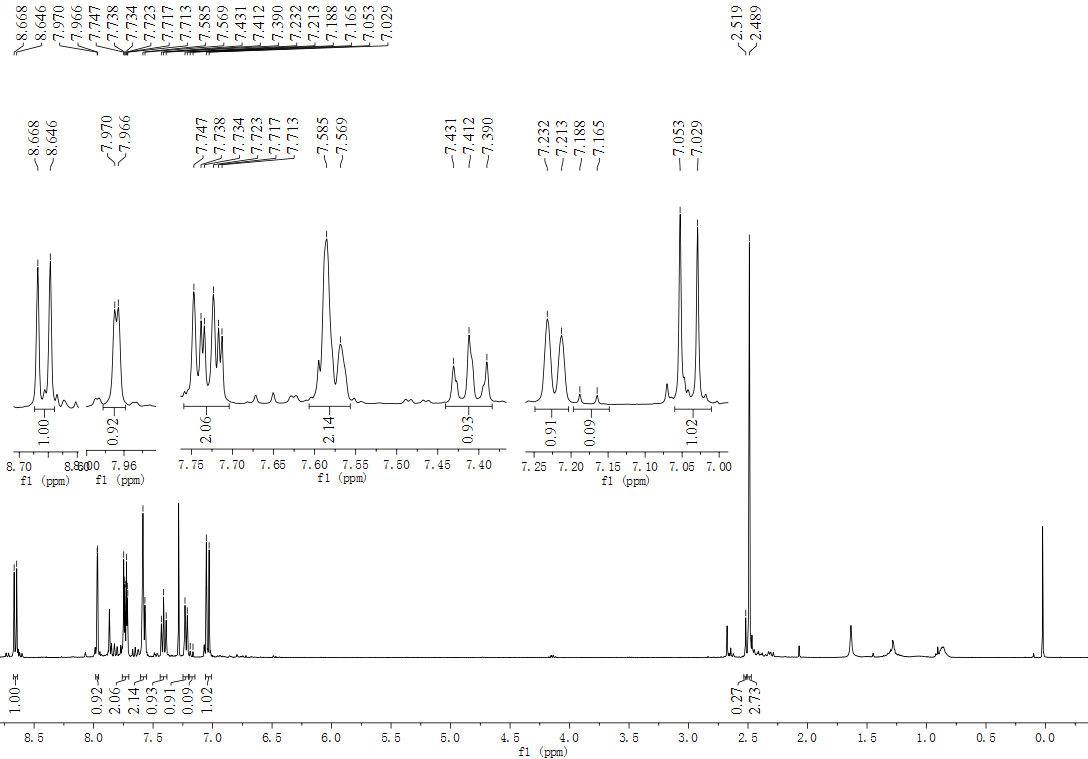

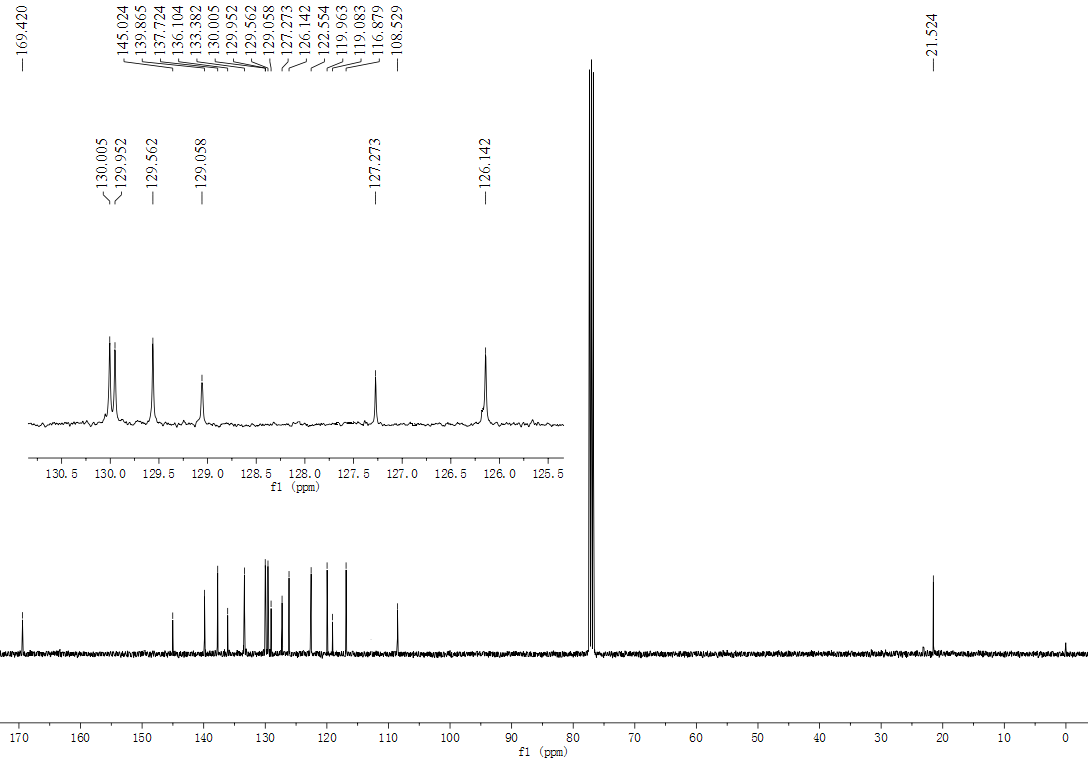

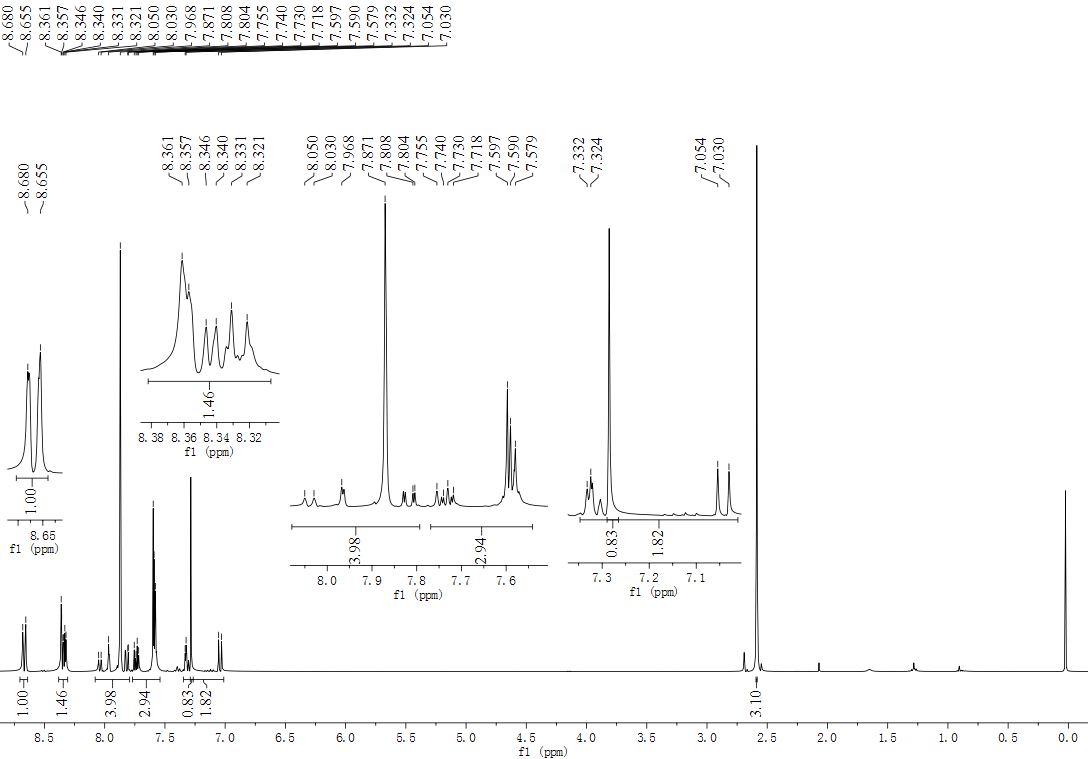

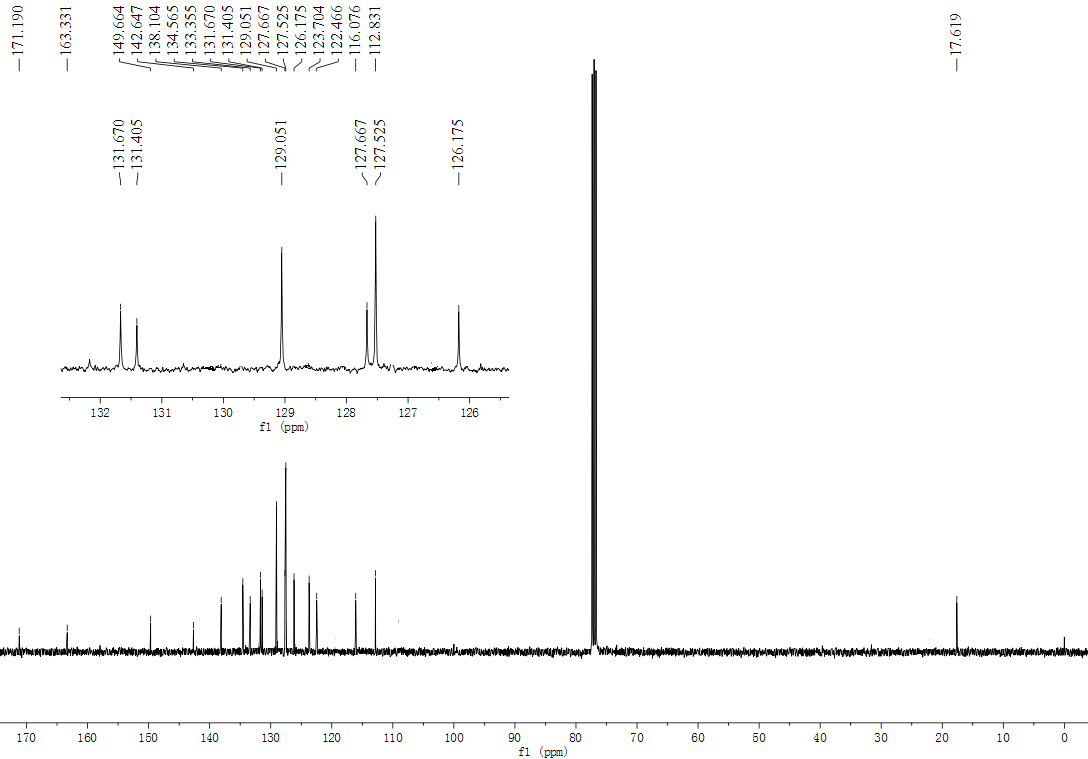

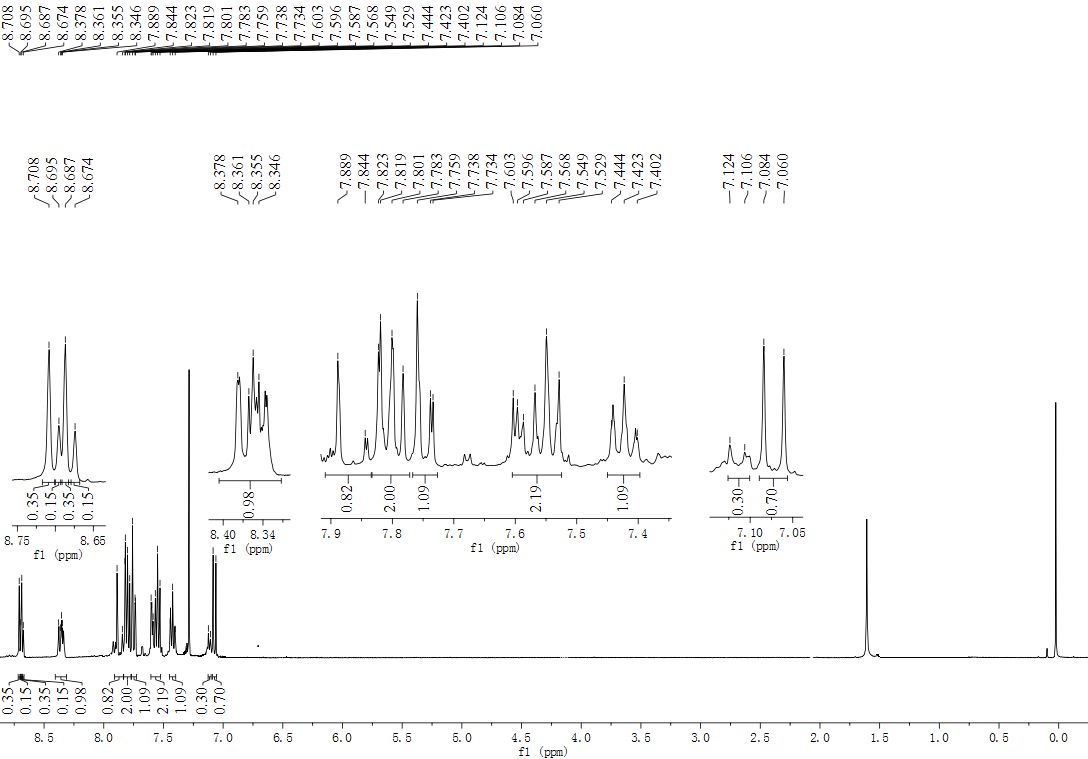

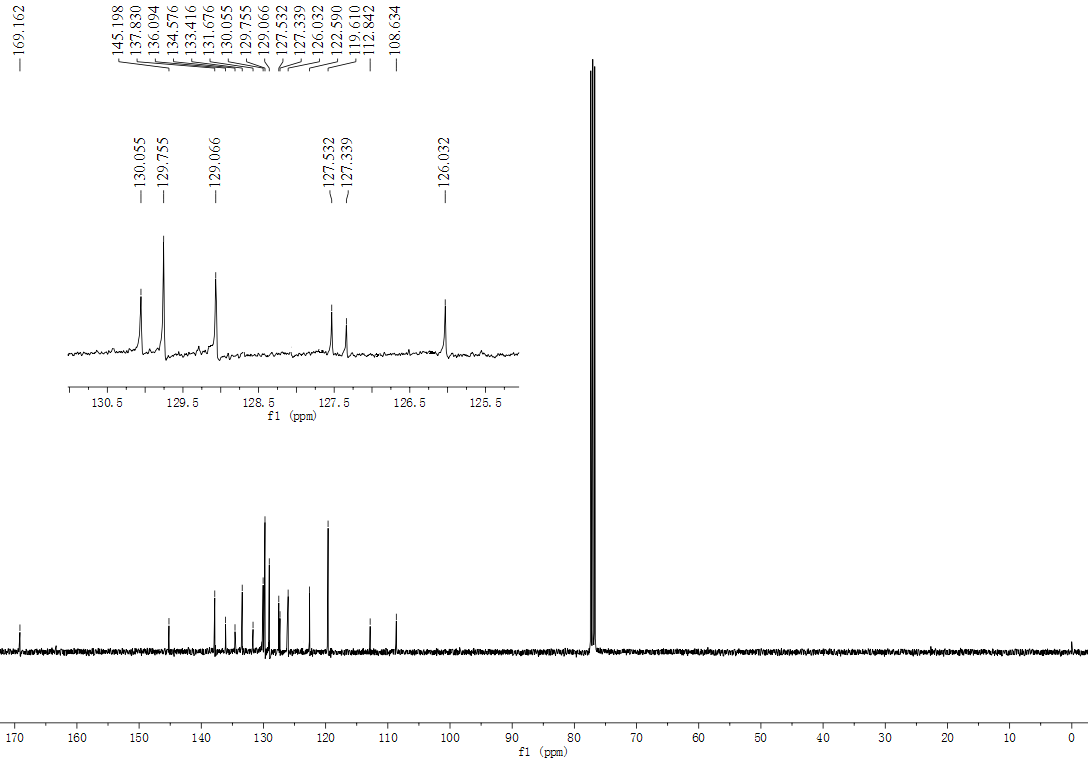


**2. NOESY spectra for compounds 3a**


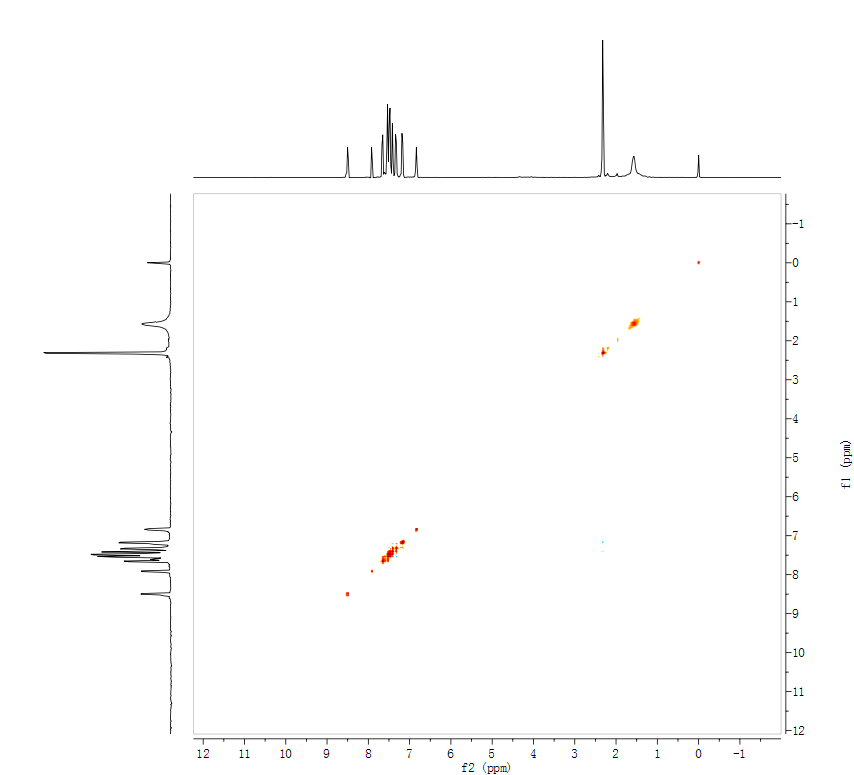

Supplement: Supplementary file 1 [file 14296730]
